# Supplementary material for: Metabolic QTL Analysis Links Chloroquine Resistance in Plasmodium falciparum to Impaired Hemoglobin Catabolism
Source: PLOS journal article supplement (doi:10.1371/journal.pgen.1004085), 2014-01-02
Supplement: S6 (10.1371/journal.pgen.1004085.s006) [file journal.pgen.1004085.s006]

74

75

76

C2

A

T

G

A

A

T

A

A

A

C4

T

G

A

C

Generation 0

Generation 15

Generation 30

A  
T  
G  
C

*pfcr*t DNA sequence in mixed C2/C4 cultures
