# Supplementary material for: Metabolic QTL Analysis Links Chloroquine Resistance in Plasmodium falciparum to Impaired Hemoglobin Catabolism
Source: PLOS journal article supplement (doi:10.1371/journal.pgen.1004085), 2014-01-02

Abundance observed by quantitative DNA sequencing

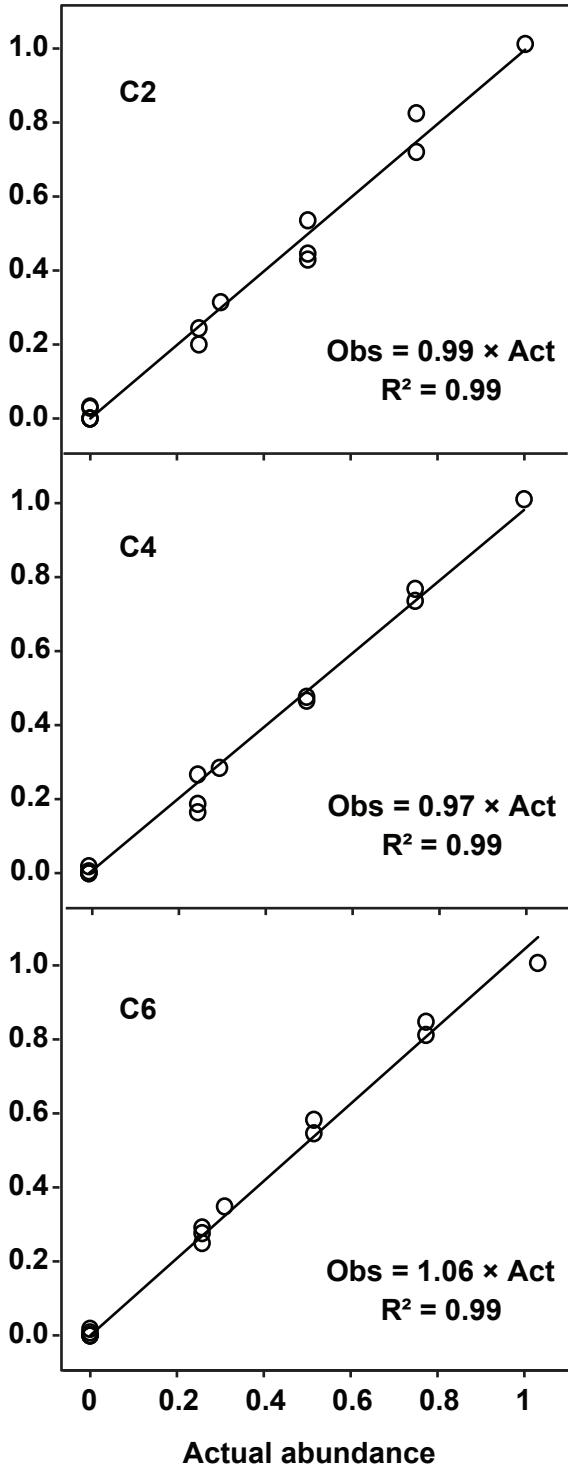

Supplement: S7 (10.1371/journal.pgen.1004085.s007) [file journal.pgen.1004085.s007]
